# Supplementary material for: Development of substituted benzylidene derivatives as novel dual cholinesterase inhibitors for Alzheimer's treatment
Source: Royal Society of Chemistry journal article supplement (doi:10.1039/d3ra03224h), 2023-01-01
Supplement: d3ra03224h1.pdf [file d3ra03224h1.pdf]

**Development of substituted benzylidene derivatives as Novel Dual Cholinesterase Inhibitors for Alzheimer's treatment**

Shraddha Manish Gupta<sup>1,2</sup>, Ashok Behera<sup>3</sup>, Neetesh K Jain<sup>1</sup>, Avanish Tripathi<sup>4</sup>, Dinesh Rishipathak<sup>5</sup>, Siddharth Singh<sup>2</sup>, Nafees ahemad<sup>6</sup>, Meryem Erol<sup>7</sup>, Devendra Kumar<sup>8\*</sup>

<sup>1</sup>Faculty of Pharmacy, Oriental University, Indore-453555, Madhya Pradesh, India.

<sup>2</sup>Department of Pharmaceutical Sciences, School of Health Sciences and Technology, University of Petroleum and Energy Studies (UPES), Dehradun- 248007, India.

<sup>3</sup>Faculty of Pharmacy, School of pharmacy and population health informatics, DIT University, Makkawala, Dehradun, Uttarakhand, India.

<sup>4</sup>Institute of Pharmaceutical Research, GLA University, Mathura-281 406 (U.P.), India.

<sup>5</sup>Department of Pharmaceutical Chemistry, MET's Institute of Pharmacy, Nasik, Maharashtra, India

<sup>6</sup>School of Pharmacy, Monash University, Jalan lagoon selatan, Bandar Sunway, Petaling Jaya 47500, Selangor DE, Malaysia.

<sup>7</sup>Department of Pharmaceutical Chemistry, Faculty of Pharmacy, Erciyes University, Kayseri, Turkey

<sup>8</sup>School of Pharmacy & Technology Management, SVKM's NMIMS (Deemed-to-be) University, Mukesh Patel Technology Park, Shirpur 425405, India.

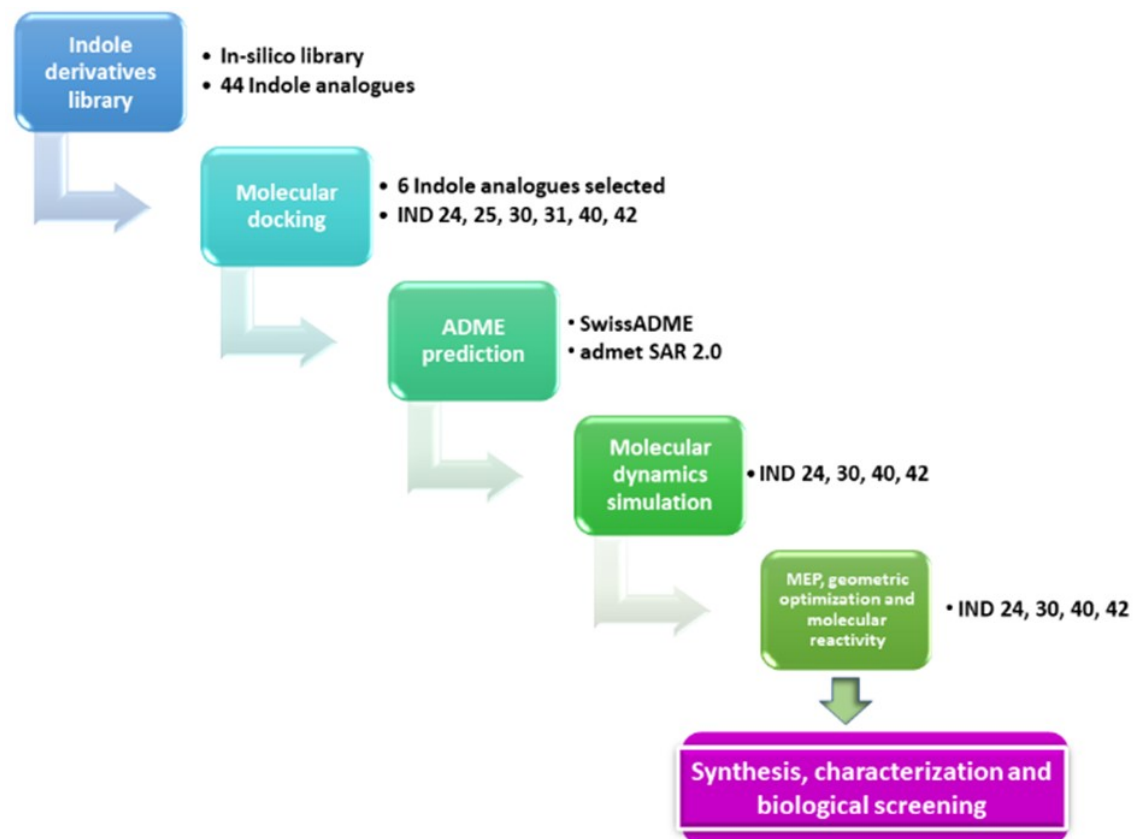

**Figure S1.** Procedure and rationale of designing Indole analogs followed by synthesis, characterization, and biological screening.

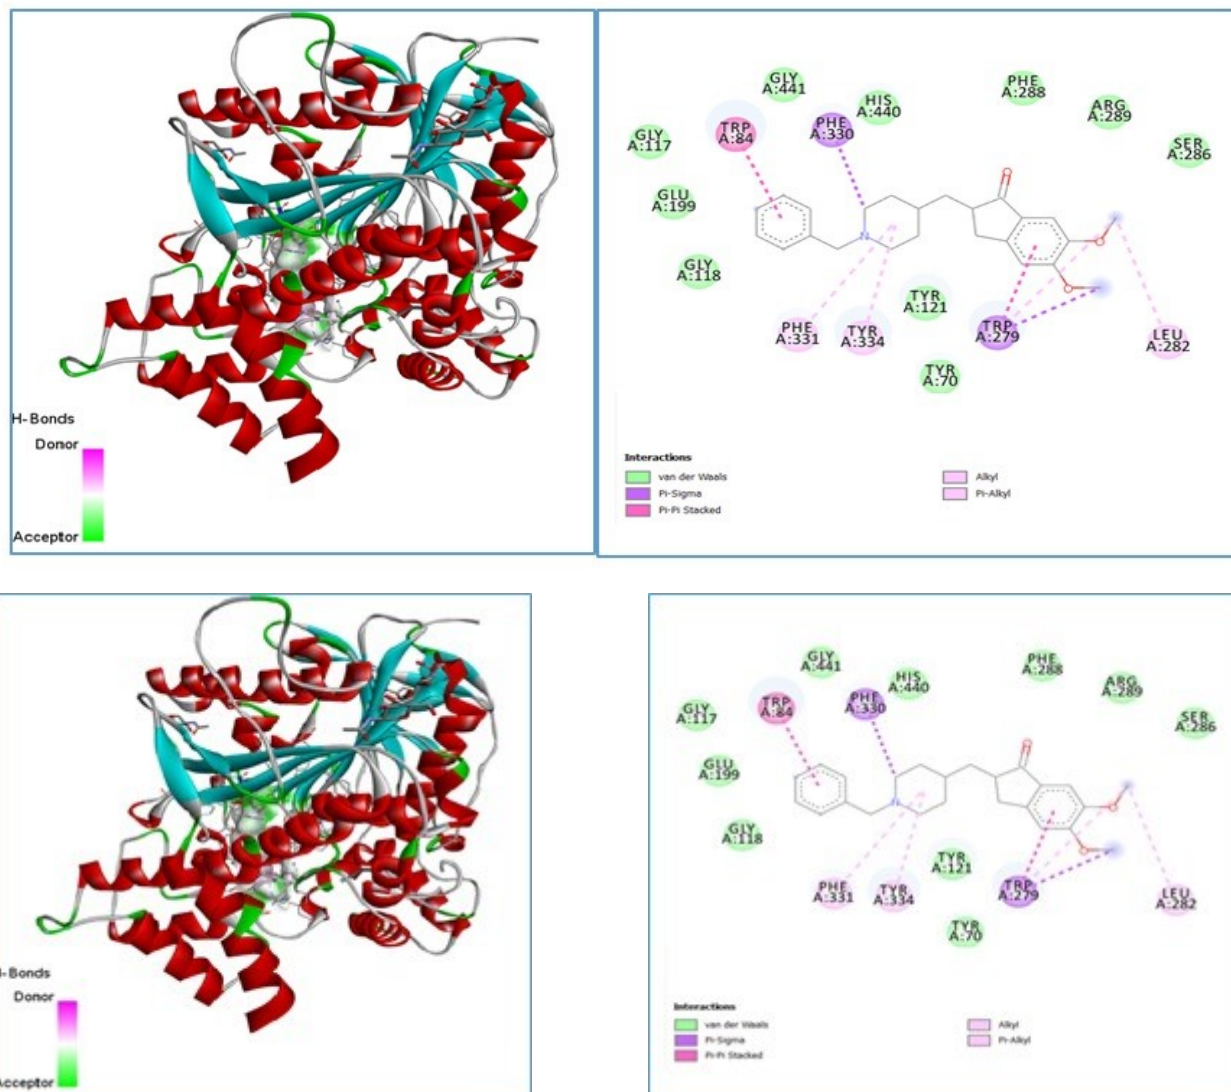

figure S2. Blind docking poses for the validation of docking

## Spectral data of synthesized compounds

### $^1\text{H}$ NMR data

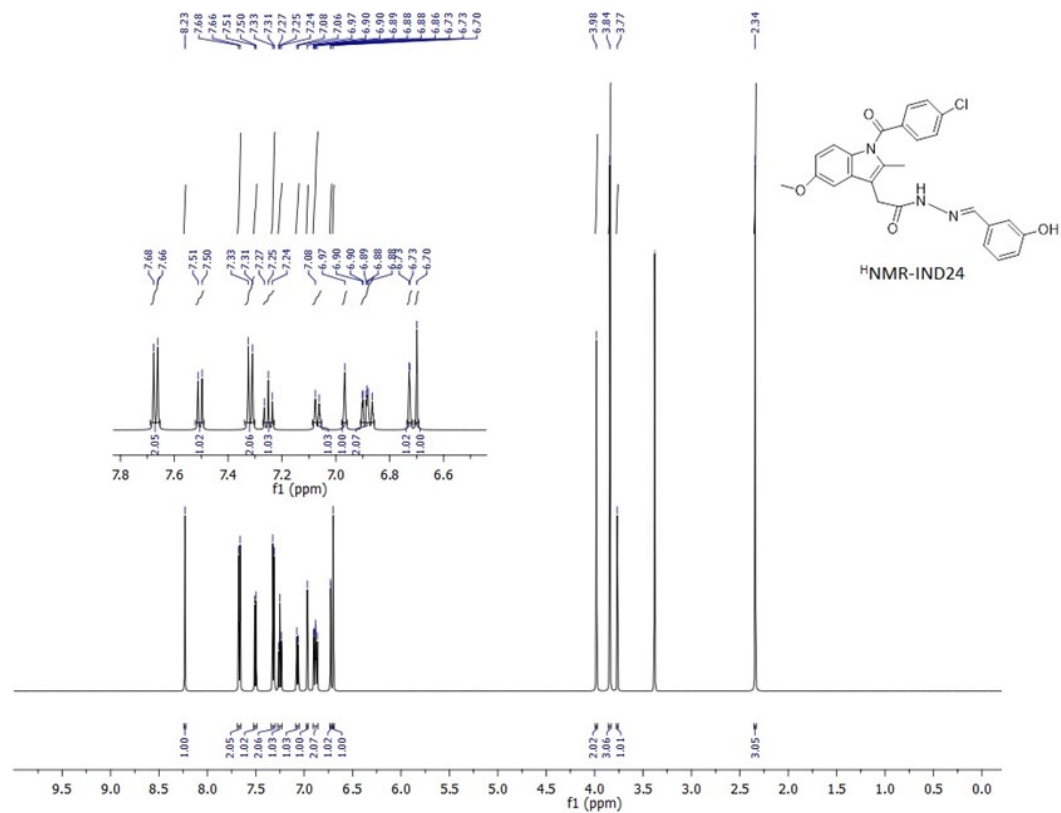

Figure S3.  $^1\text{H}$  NMR Spectra of IND-24

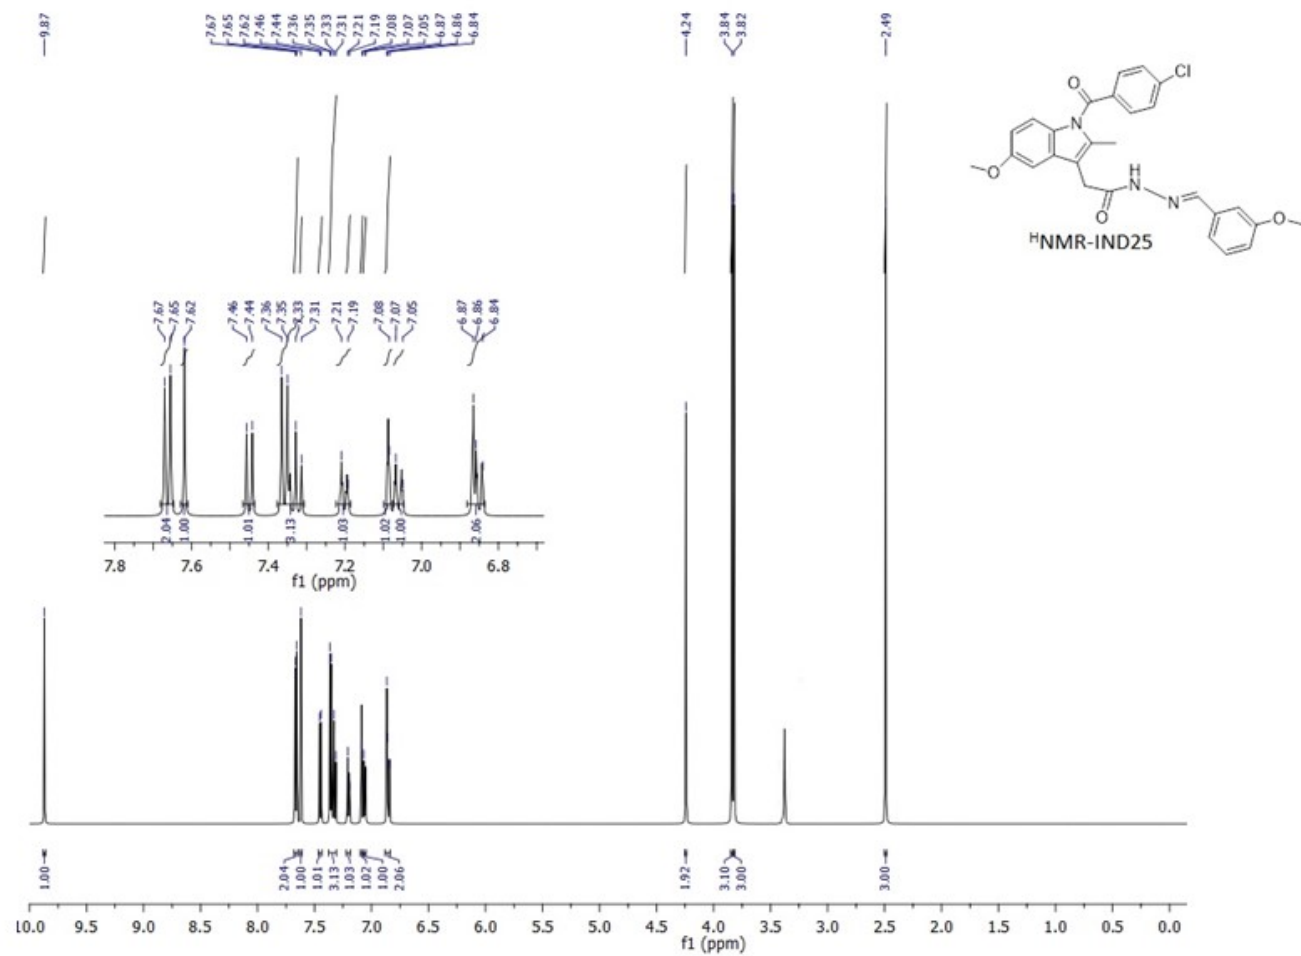

Figure S4. <sup>1</sup>H NMR Spectra of IND-25

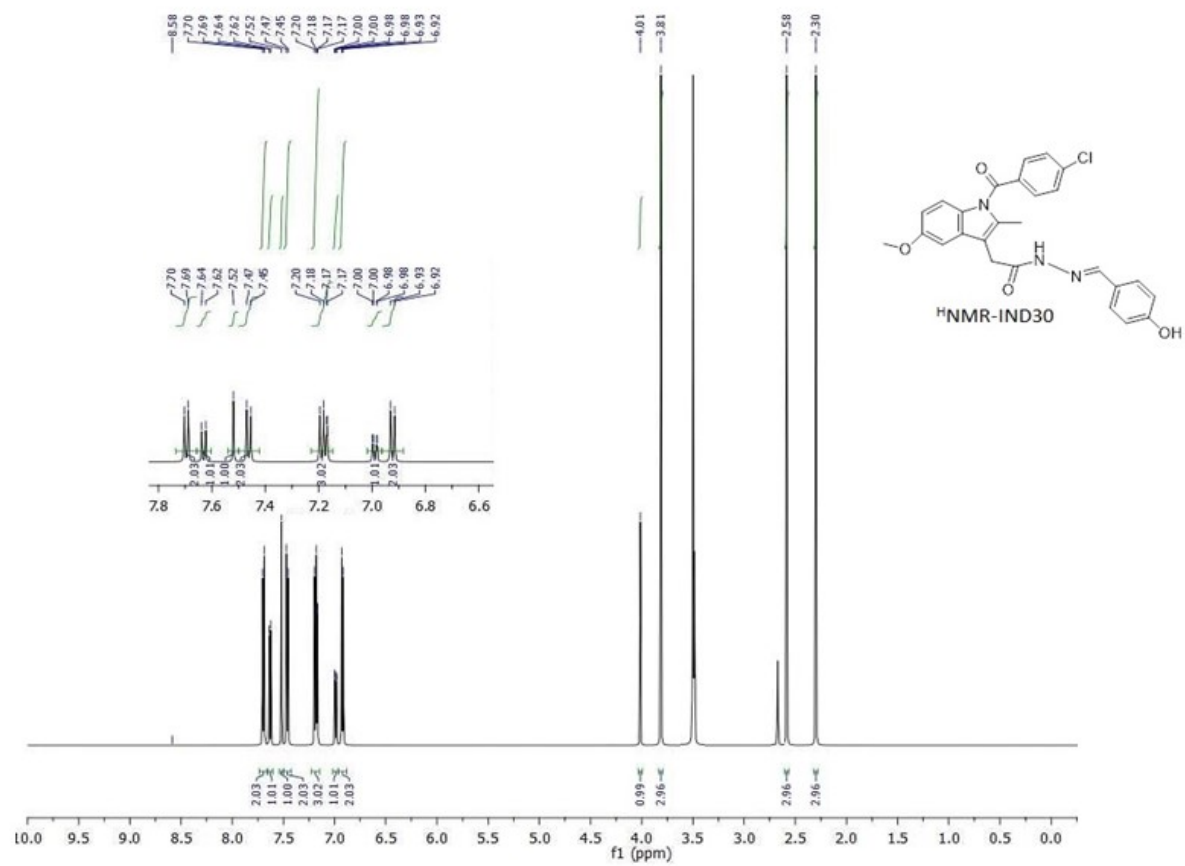

Figure S5. <sup>1</sup>H NMR Spectra of IND-30

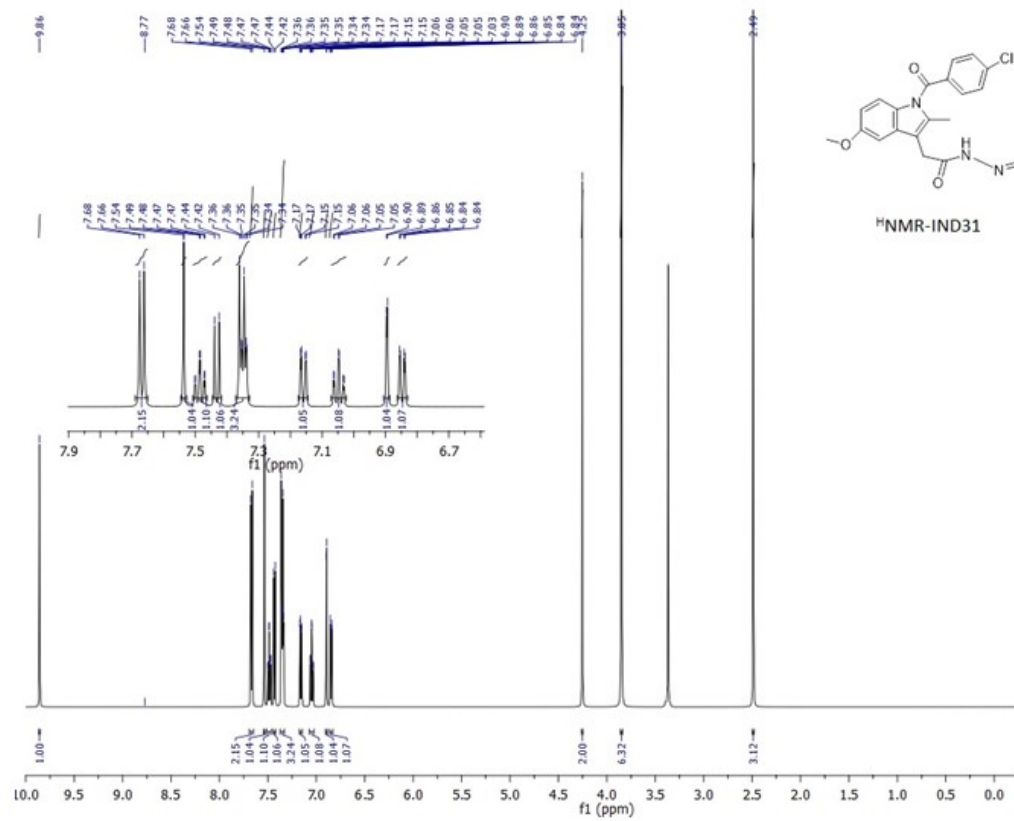

Figure S6. <sup>1</sup>H NMR Spectra of IND-31

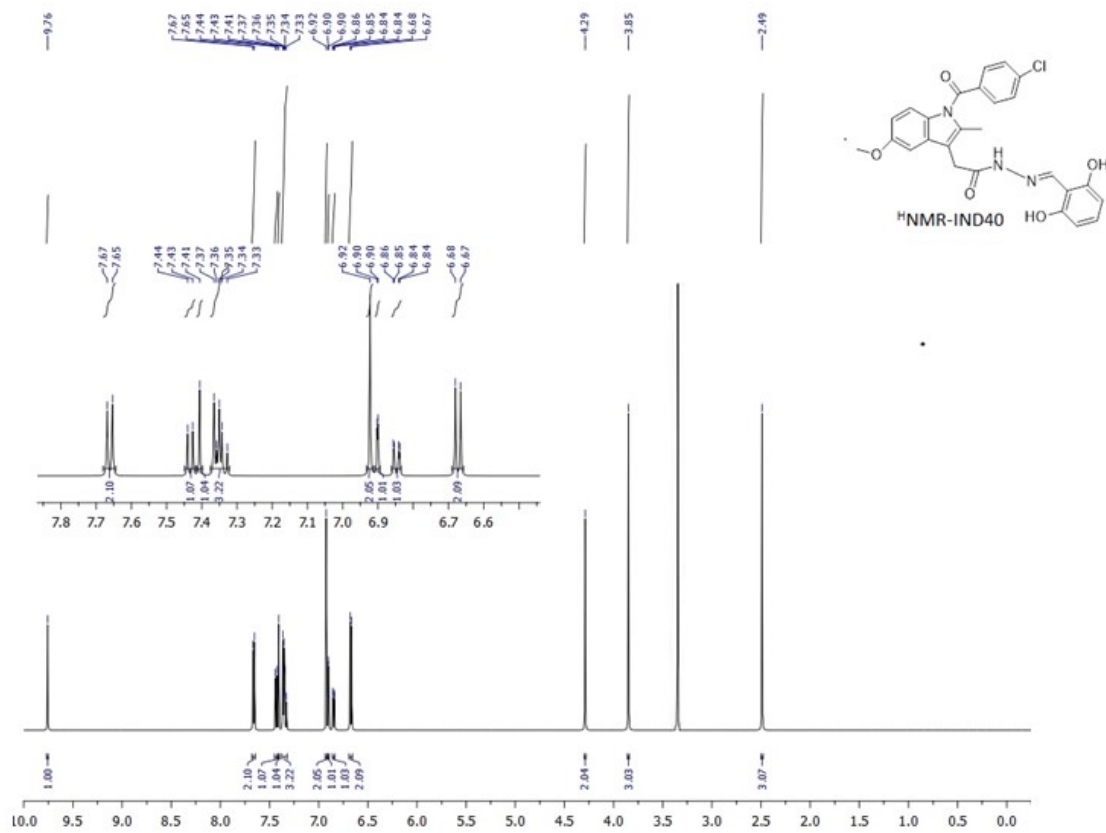

Figure S7. <sup>1</sup>H NMR Spectra of IND-40



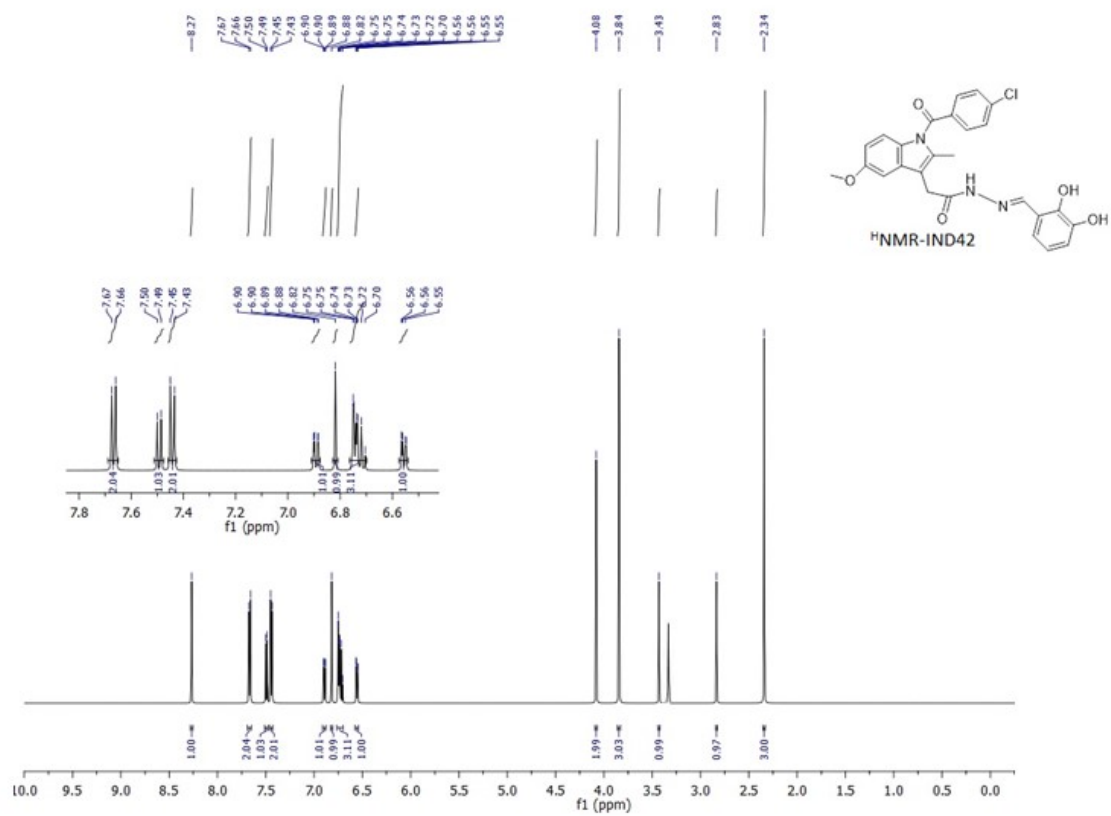

**Figure S8.** <sup>1</sup>H NMR Spectra of IND-42

# <sup>13</sup>C NMR data

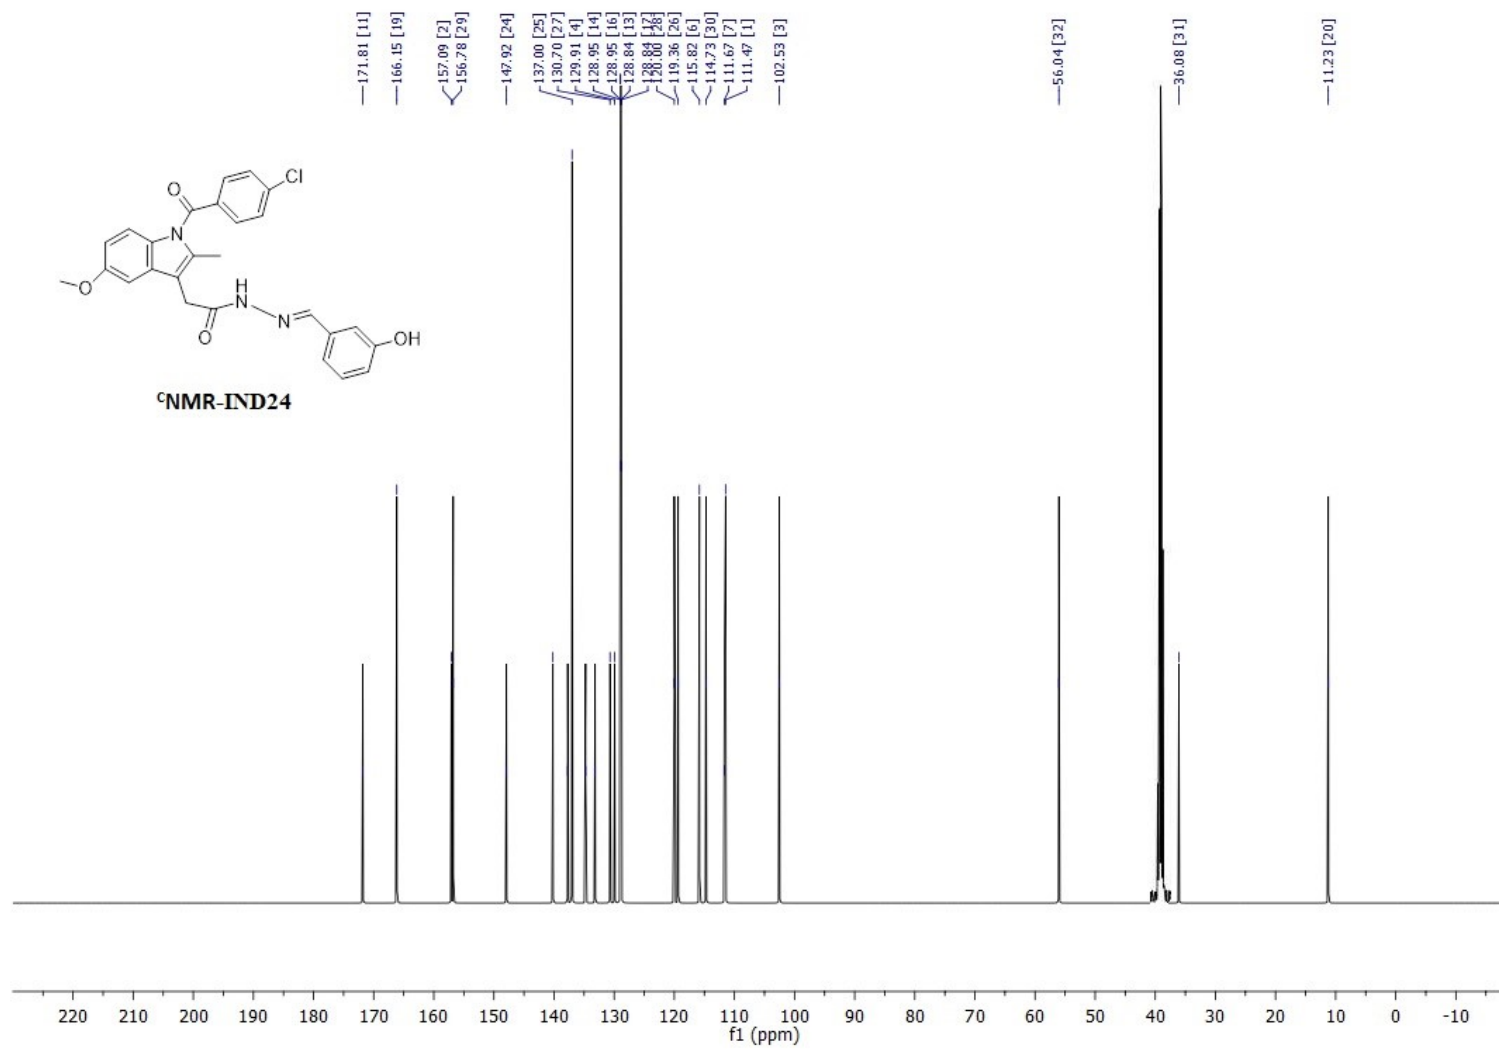

Figure S9. <sup>13</sup>C NMR Spectra of IND-24

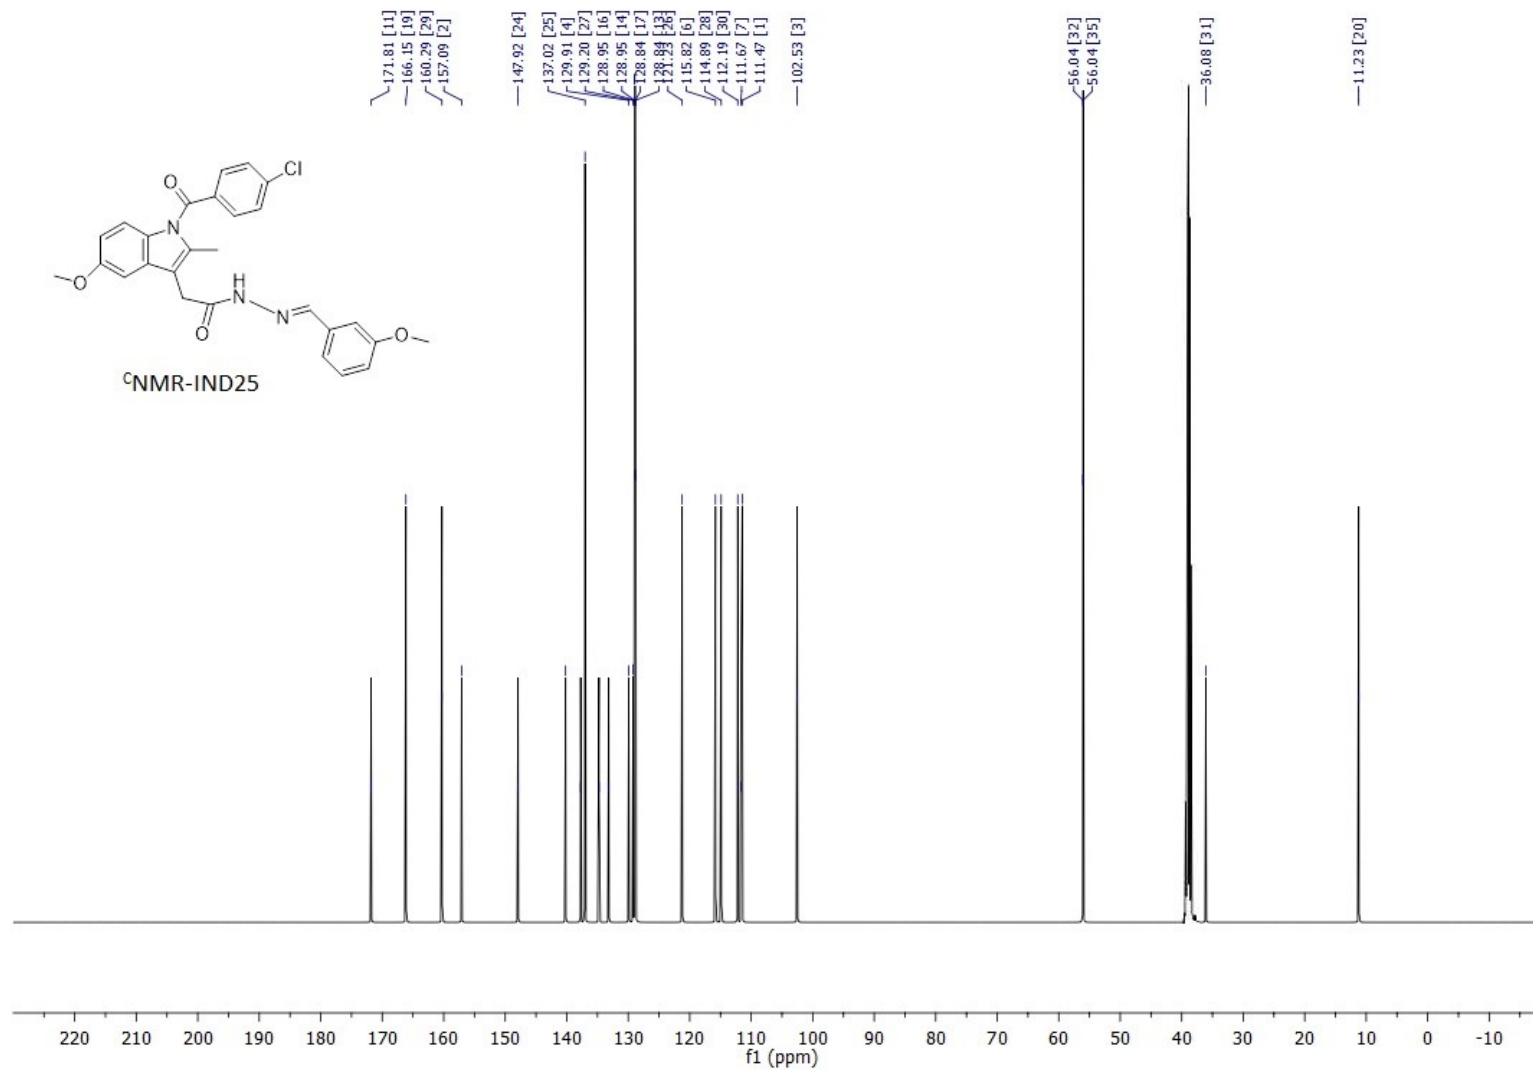

**Figure S10.** <sup>13</sup>C NMR Spectra of IND-25

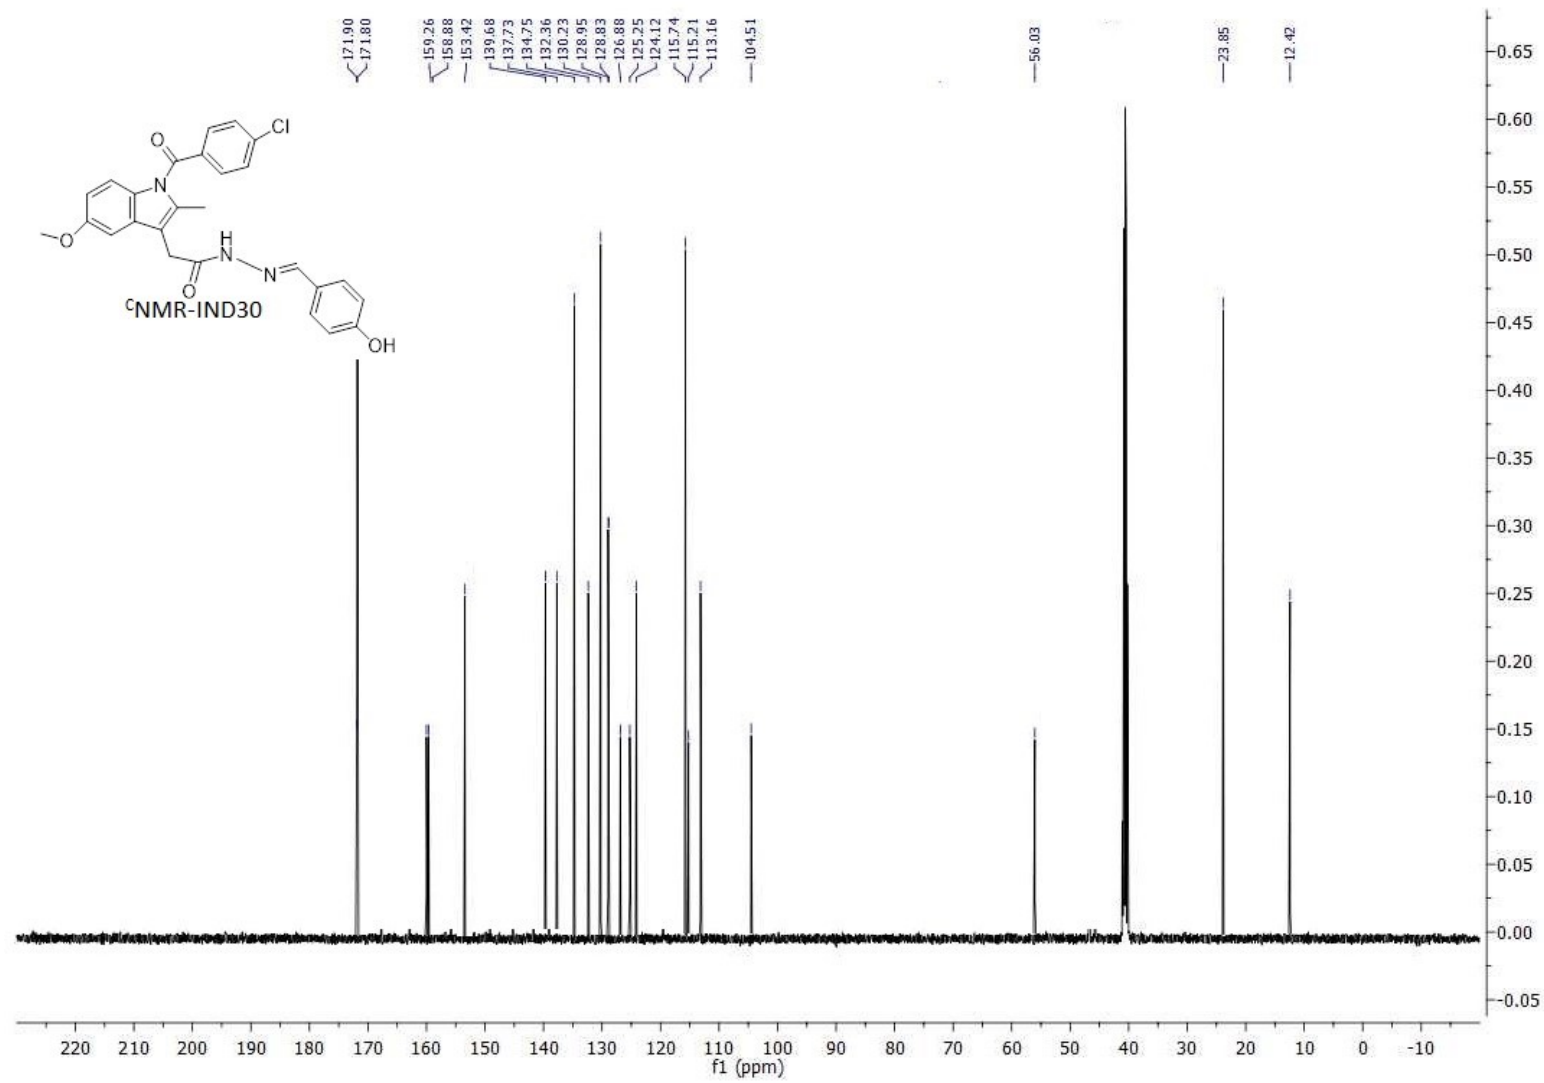

Figure S11. <sup>13</sup>C NMR Spectra of IND-30

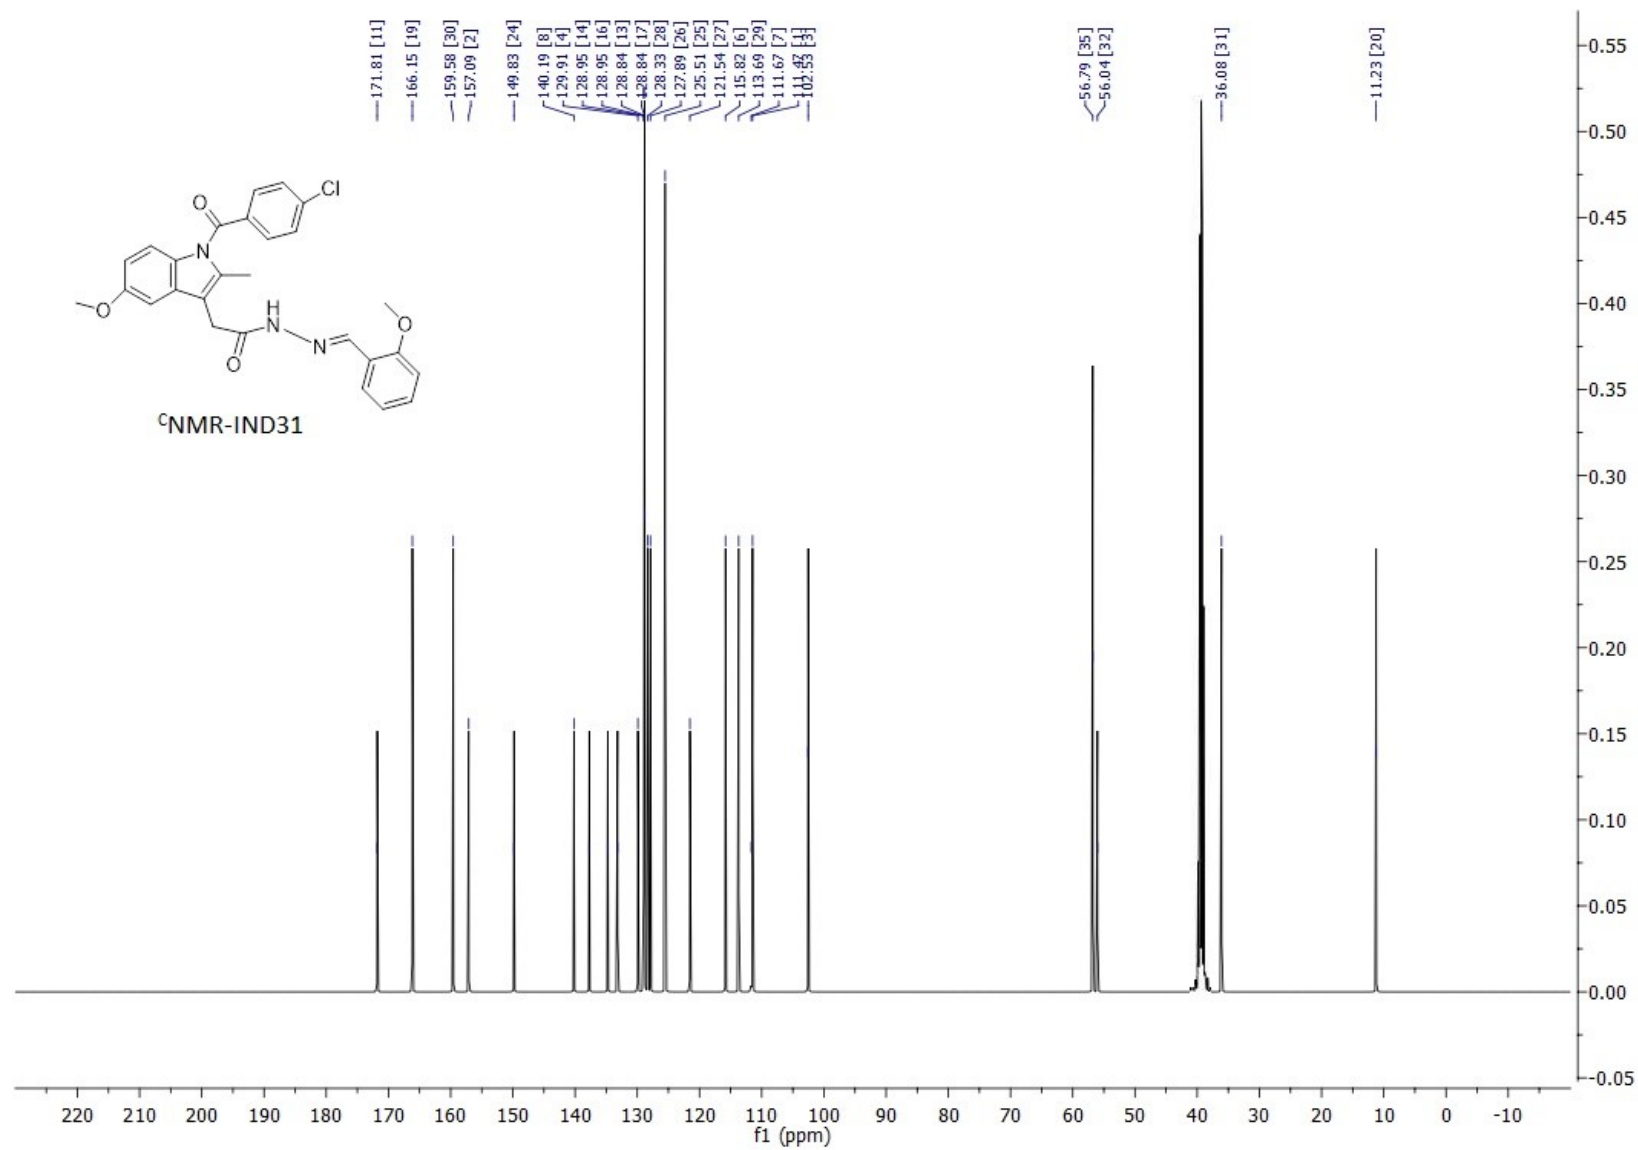

**Figure S12.** <sup>13</sup>C NMR Spectra of IND-31

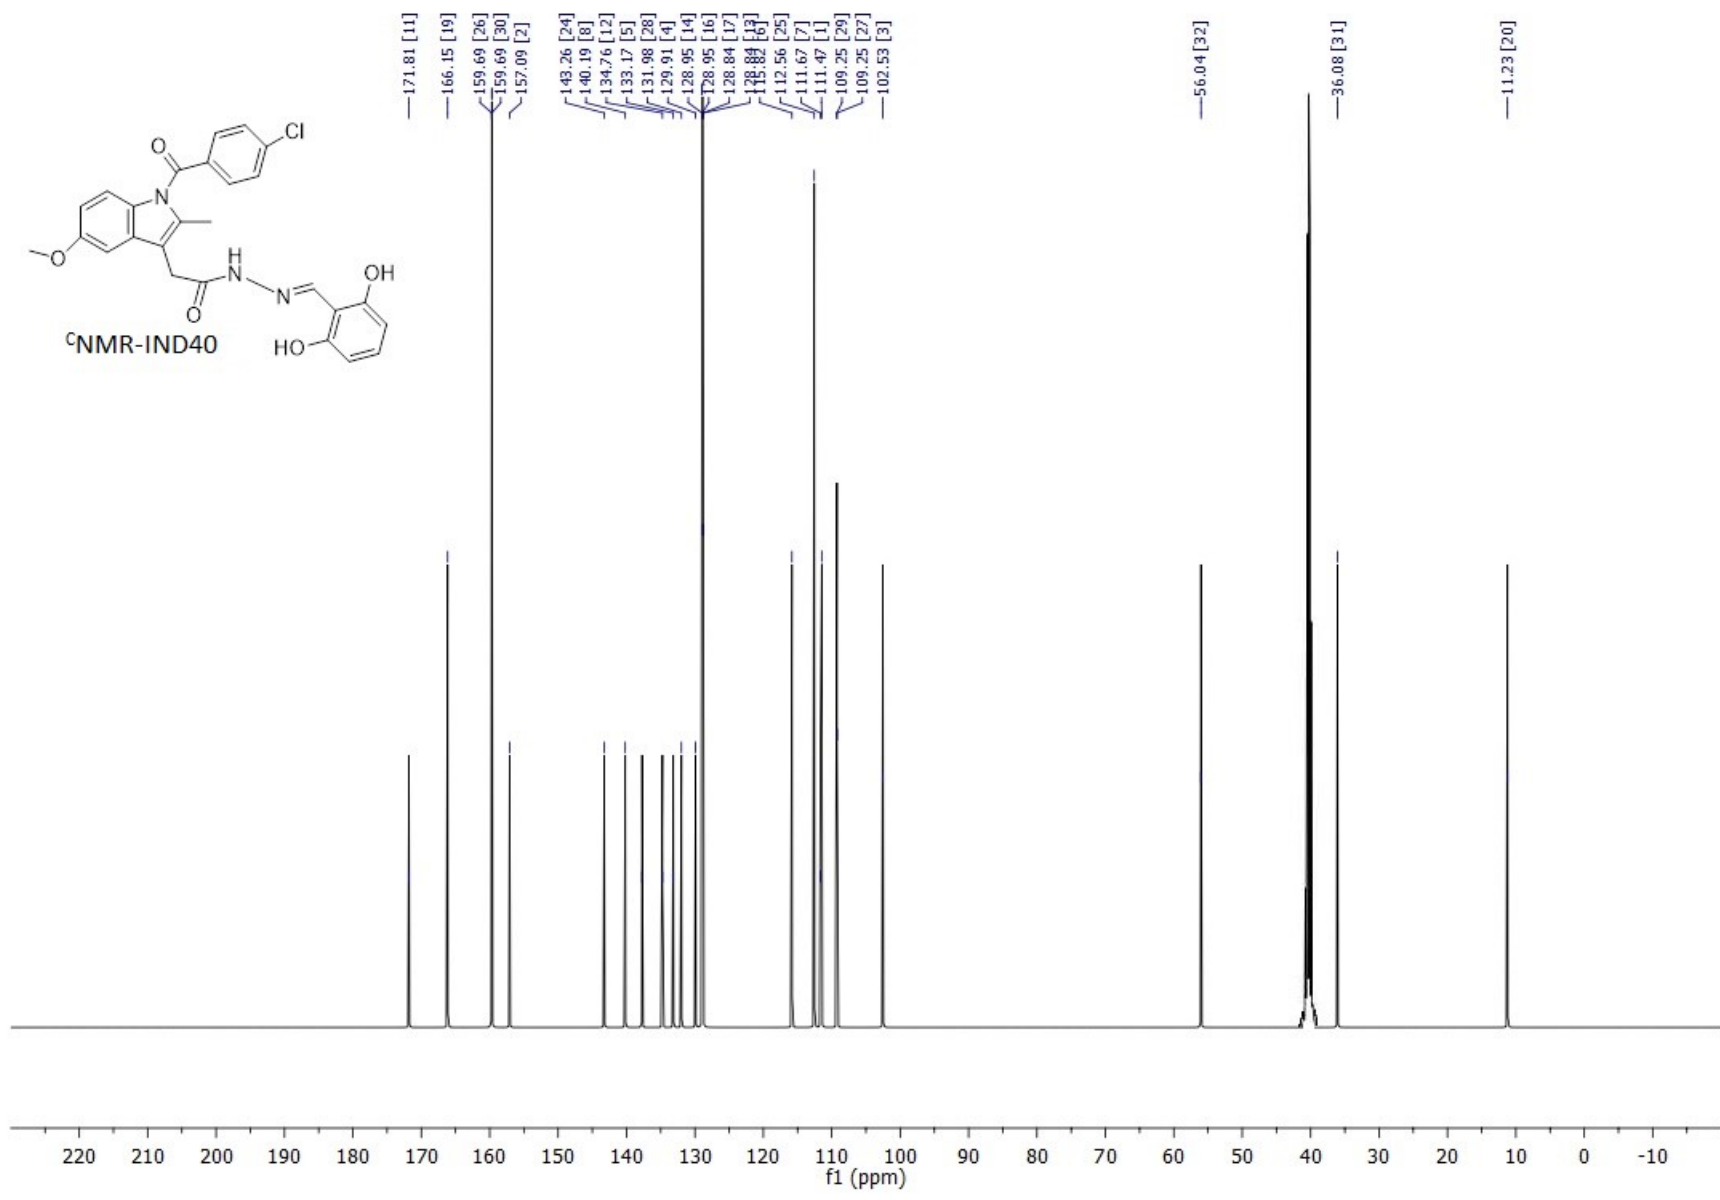

Figure S13. <sup>13</sup>C NMR Spectra of IND-40

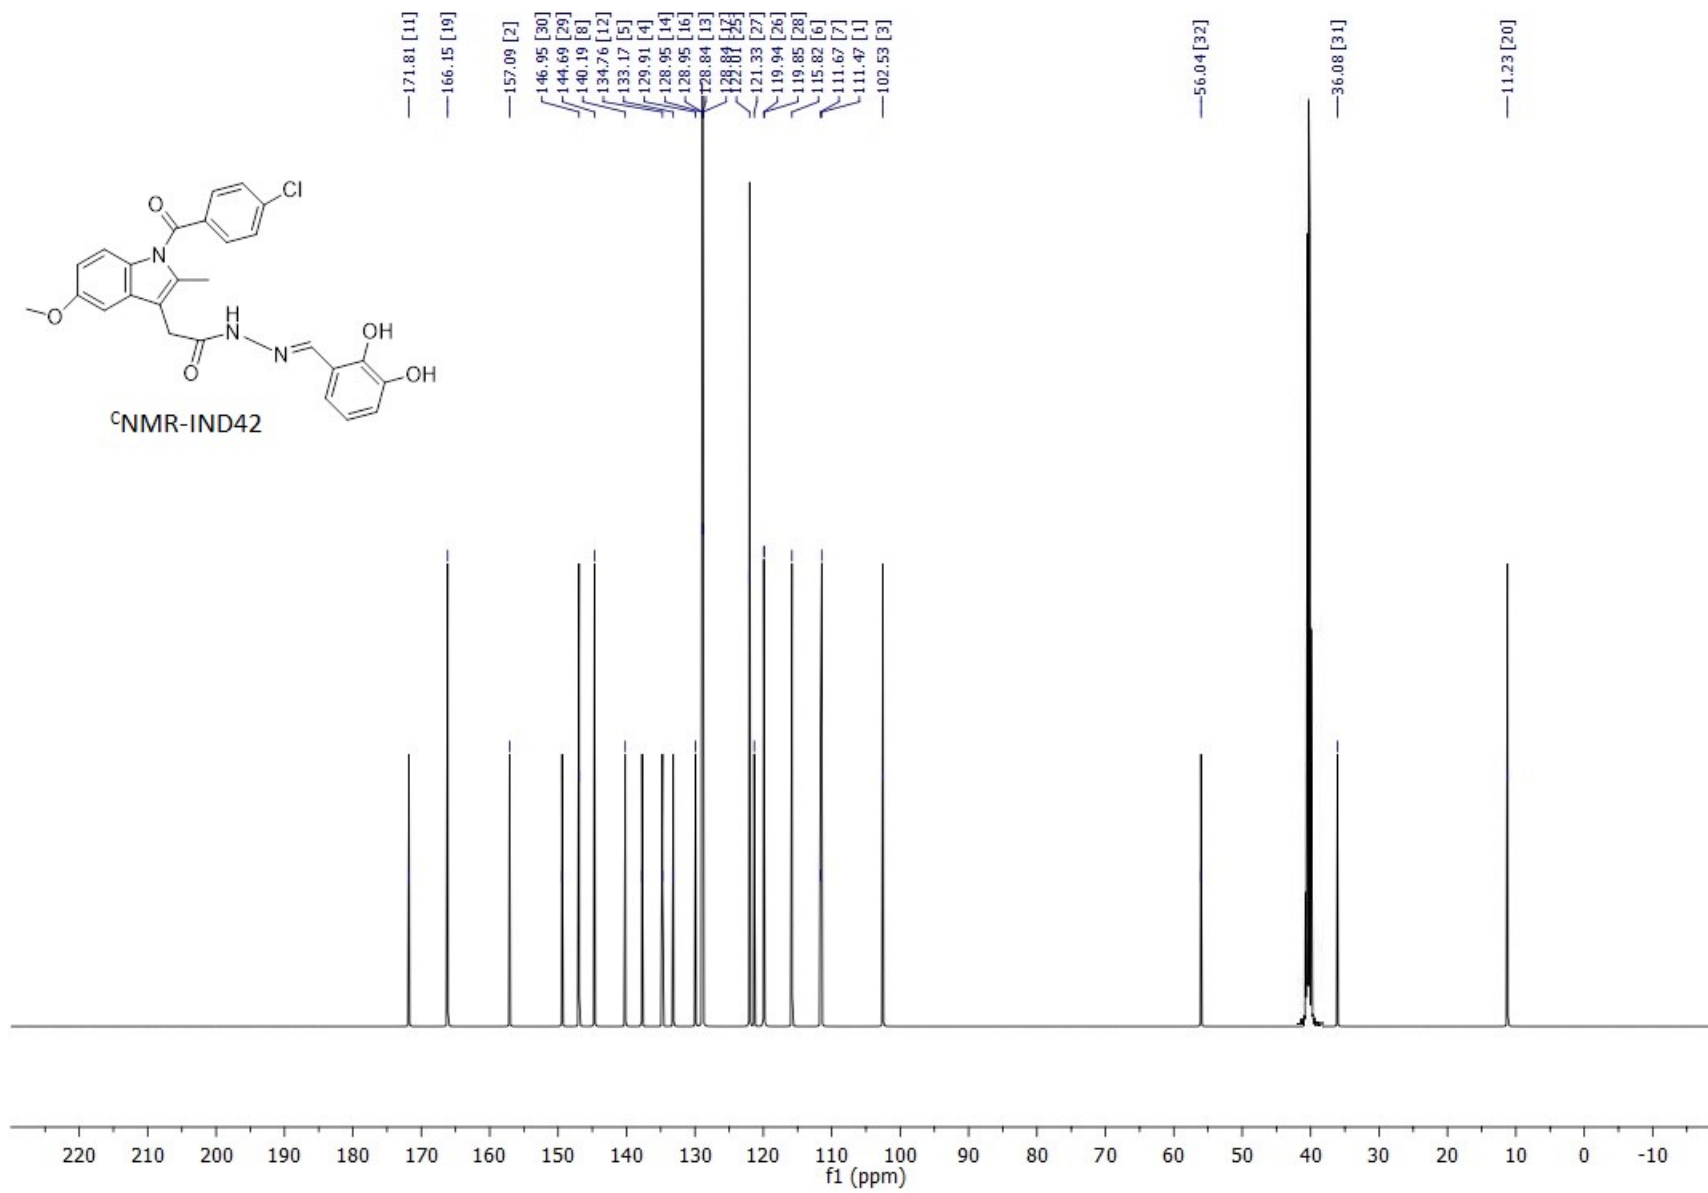

Figure S14. <sup>13</sup>C NMR Spectra of IND-42

## Mass Spectra

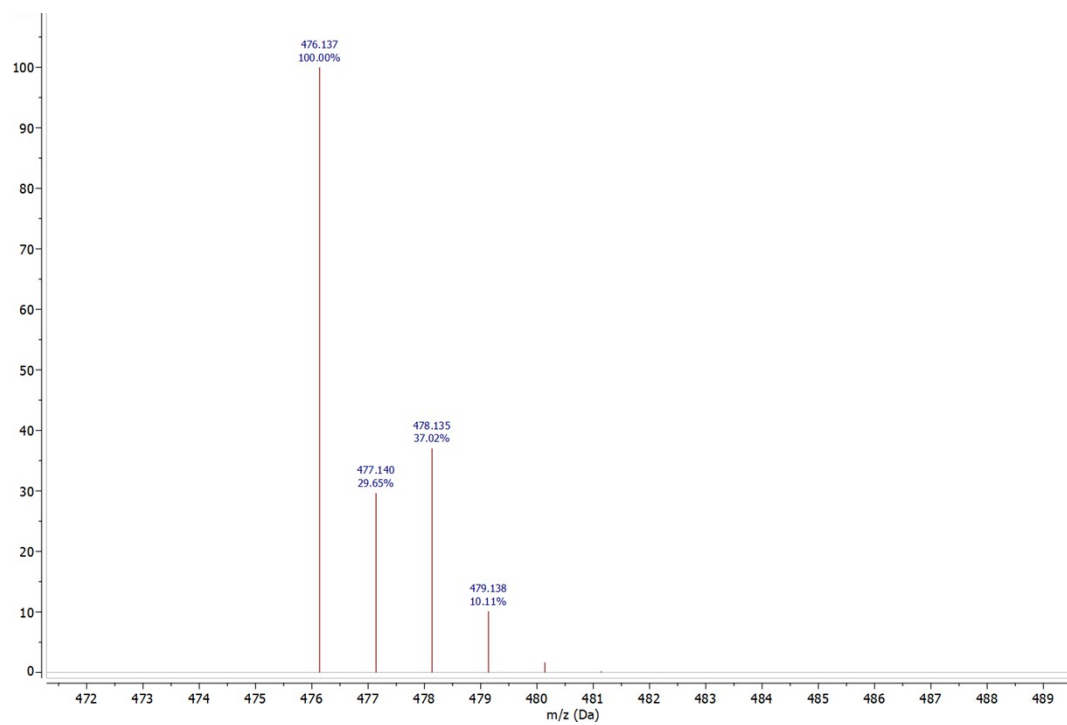

**Figure S15.** Mass Spectra of IND-24



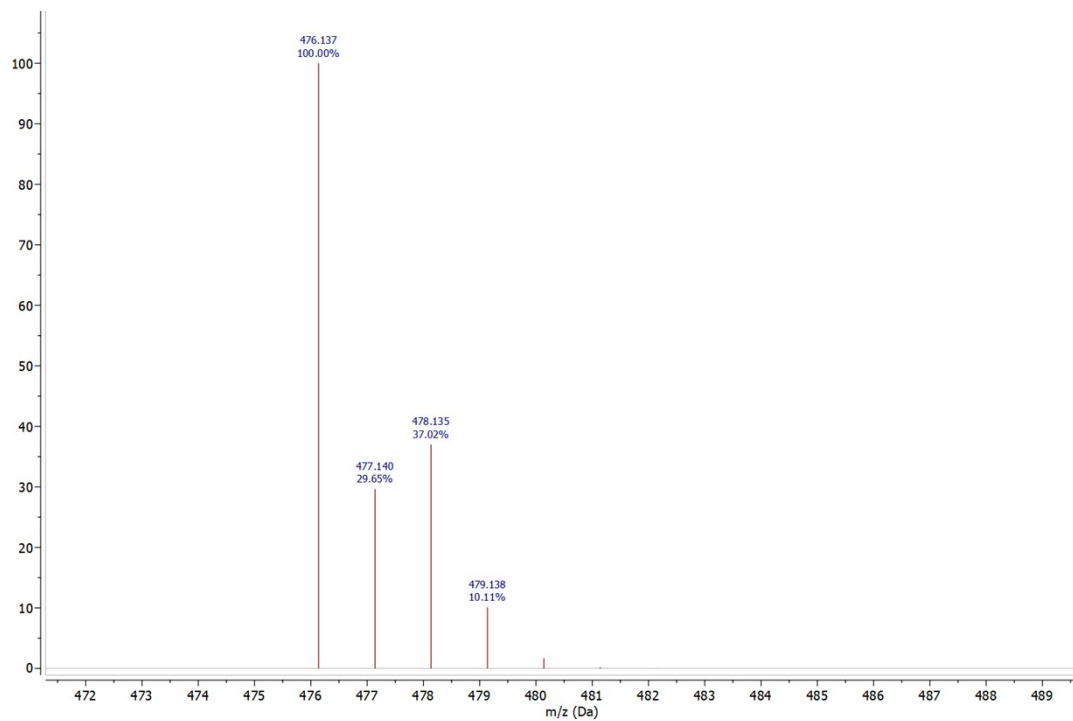

**Figure S16.** Mass Spectra of IND-30

**Table S1.** Docking Results of 44 indomethacin derivatives.

**Table S2.** The physiochemical, lipophilicity, water solubility, pharmacokinetics, drug likeliness and toxicity predictions of 44 indomethacin derivatives.

**Table S1.** Docking Results of 44 indole derivatives.

| Ligand Code | Structure of Ligand                                                                                                                                                                                                                                                                                                                                                                                                                                                                         | Binding Energy (kcal/Mol) |
|-------------|---------------------------------------------------------------------------------------------------------------------------------------------------------------------------------------------------------------------------------------------------------------------------------------------------------------------------------------------------------------------------------------------------------------------------------------------------------------------------------------------|---------------------------|
|             |                                                                                                                                                                                                                                                                                                                                                                                                                                                                                             | AChE (1eve) docking       |
| IND         | 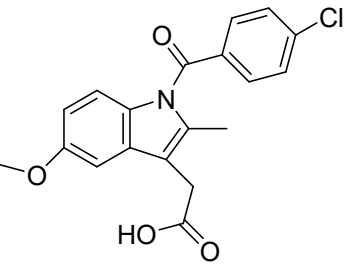 <p>The structure shows a central indole ring system. At the 2-position, there is a methyl group and a propionic acid side chain (-CH2-CH2-COOH). At the 3-position, there is a benzoyl group (-C(=O)-C6H4-Cl) where the chlorine atom is at the para position. At the 5-position, there is a methoxy group (-OCH3).</p>                                                                                  | -10.1                     |
| IND-1       |  <p>The structure shows a central indole ring system. At the 2-position, there is a methyl group and a propionic acid side chain (-CH2-CH2-COOH). At the 3-position, there is a benzoyl group (-C(=O)-C6H5). At the 5-position, there is a methoxy group (-OCH3). At the 6-position, there is a propionamide side chain (-CH2-CH2-C(=O)-NH-C6H4-Cl) where the chlorine atom is at the para position.</p> | -11.0                     |

|                     |                                                                                     |              |
|---------------------|-------------------------------------------------------------------------------------|--------------|
| <p><b>IND-2</b></p> | 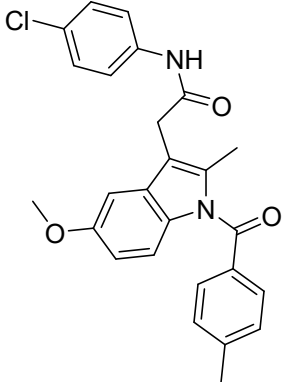  | <p>-11.2</p> |
| <p><b>IND-3</b></p> |  | <p>-11.4</p> |

|       |                                                                                      |       |
|-------|--------------------------------------------------------------------------------------|-------|
| IND-4 | 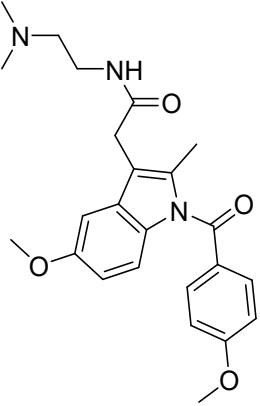   | -10.2 |
| IND-5 |    | -10.2 |
| IND-6 |  | -9.2  |

|       |                                                                                     |       |
|-------|-------------------------------------------------------------------------------------|-------|
| IND-7 | 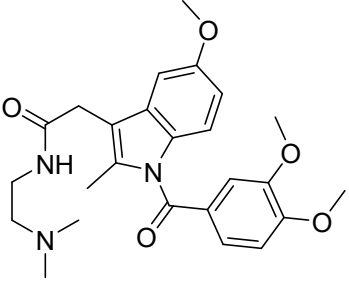  | -9.0  |
| IND-8 |   | -8.1  |
| IND-9 |  | -11.1 |

|               |                                                                                      |             |
|---------------|--------------------------------------------------------------------------------------|-------------|
| <b>IND-10</b> | 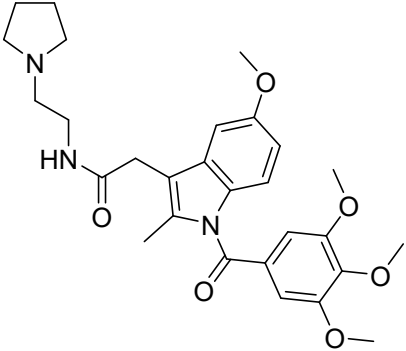   | <p>-8.8</p> |
| <b>IND-11</b> |    | <p>-9.1</p> |
| <b>IND-12</b> |  | <p>-9.9</p> |

|               |                                                                                     |       |
|---------------|-------------------------------------------------------------------------------------|-------|
| <b>IND-13</b> | 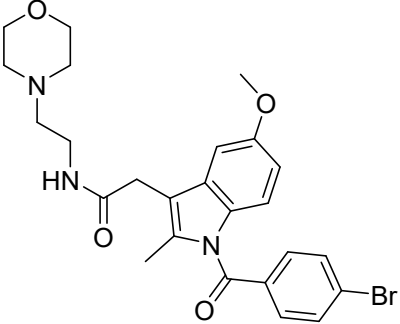  | NA    |
| <b>IND-14</b> |   | -10.6 |
| <b>IND-15</b> |  | -10.4 |

|        |                                                                                     |      |
|--------|-------------------------------------------------------------------------------------|------|
| IND-16 | 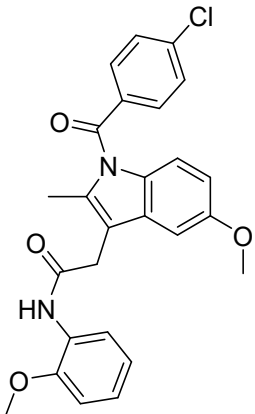  | -8.0 |
| IND-17 |   | -8.1 |
| IND-18 |  | -9.6 |



|        |                                                                                     |       |
|--------|-------------------------------------------------------------------------------------|-------|
| IND-19 | 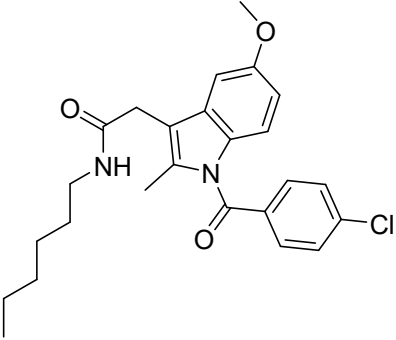  | -8.0  |
| IND-20 |   | -11.6 |
| IND-21 |  | -11.8 |

|               |                                                                                     |       |
|---------------|-------------------------------------------------------------------------------------|-------|
| <b>IND-22</b> | 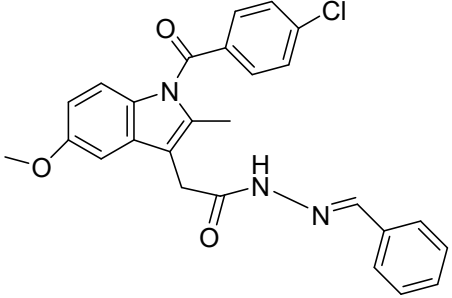  | -11.2 |
| <b>IND-23</b> |   | -11.6 |
| <b>IND-24</b> |  | -11.4 |

|               |                                                                                     |       |
|---------------|-------------------------------------------------------------------------------------|-------|
| <b>IND-25</b> | 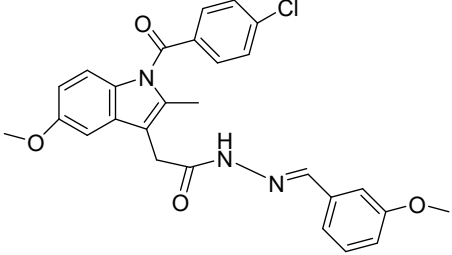  | -11.3 |
| <b>IND-26</b> |   | -11.9 |
| <b>IND-27</b> |  | -11.6 |

|               |                                                                                     |       |
|---------------|-------------------------------------------------------------------------------------|-------|
| <b>IND-28</b> | 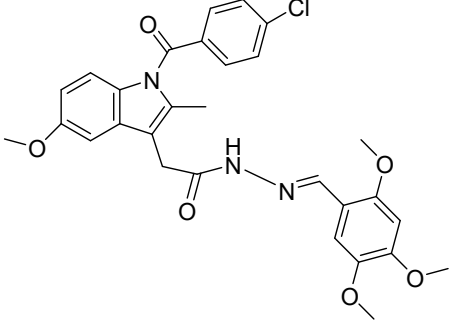  | -11.4 |
| <b>IND-29</b> |   | -11.3 |
| <b>IND-30</b> |  | -11.4 |

|               |                                                                                     |       |
|---------------|-------------------------------------------------------------------------------------|-------|
| <b>IND-31</b> | 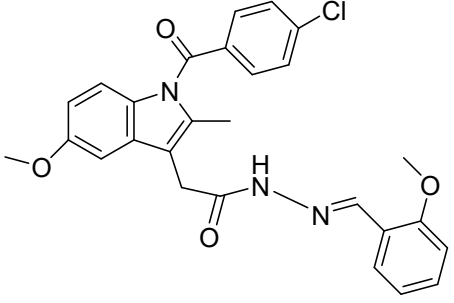  | -11.4 |
| <b>IND-32</b> |   | -11.4 |
| <b>IND-33</b> |  | -12.1 |

|        |                                                                                     |       |
|--------|-------------------------------------------------------------------------------------|-------|
| IND-34 | 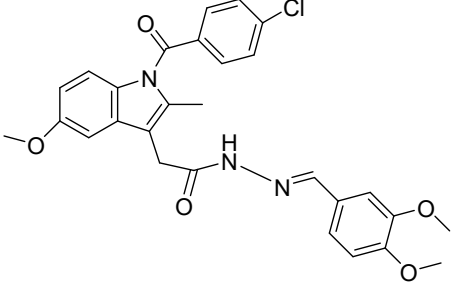  | -11.7 |
| IND-35 |   | -11.4 |
| IND-36 |  | -12.3 |

|               |                                                                                     |       |
|---------------|-------------------------------------------------------------------------------------|-------|
| <b>IND-37</b> | 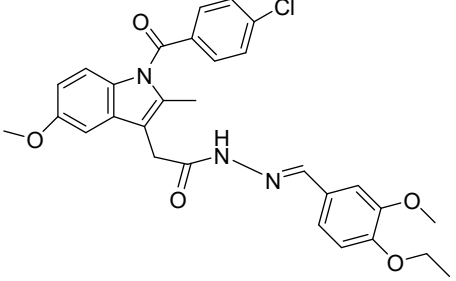  | -11.3 |
| <b>IND-38</b> |   | -11.4 |
| <b>IND-39</b> |  | -11.2 |

|               |                                                                                     |       |
|---------------|-------------------------------------------------------------------------------------|-------|
| <b>IND-40</b> | 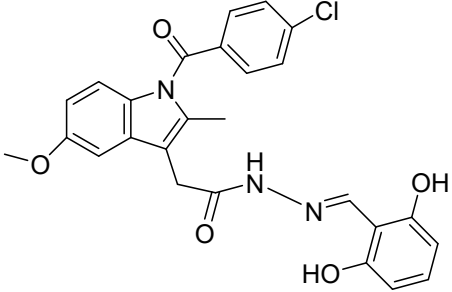  | -11.1 |
| <b>IND-41</b> |   | -11.7 |
| <b>IND-42</b> |  | -11.3 |



|                    |                                                                                    |       |
|--------------------|------------------------------------------------------------------------------------|-------|
| <b>IND-43</b>      | 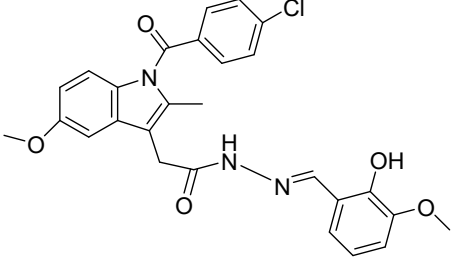 | -11.5 |
| <b>IND-44</b>      |  | -11.6 |
| <b>E20 (Bound)</b> |                                                                                    | -11   |

**Table S2.** The physiochemical, lipophilicity, water solubility, pharmacokinetics, drug likeliness and toxicity predictions of 44 indomethacin derivatives.

| Sr.No    | Swiss-ADME                 |        |       |       |        |          |                    |                    |                   |                  |       |        | ADMET SAR 2.0                               |                  |                         |                               |                           |
|----------|----------------------------|--------|-------|-------|--------|----------|--------------------|--------------------|-------------------|------------------|-------|--------|---------------------------------------------|------------------|-------------------------|-------------------------------|---------------------------|
|          | Physicochemical properties |        |       |       |        |          | lipophilicity      | Water Solubility   | Pharmako kinetics | Drug Lik eliness |       |        | Human ether-a-go-go-related gene inhibition | AMES Mutagenesis | Acute oral toxicity (c) | Carcinogenicity (three-class) | Rat Acute Toxicity (LD50) |
| Analogue | Mw t                       | nr otb | H B A | H B D | MR     | TPSA (A) | Consensus Log Po/w | class              | GI absorption     | Lipinski         | Veber | Muegge |                                             |                  |                         |                               |                           |
| IND      | 357.8                      | 5      | 4     | 1     | 96.12  | 68.53    | 3.63               | Moderately Soluble | High              | 0                | 0     | 0      | Weak inhibitor                              | Non-AMES toxic   | I                       | <b>Danger</b>                 | <b>4.0722</b>             |
| IND-1    | 432.90                     | 7      | 3     | 1     | 123.38 | 60.33    | 4.8                | Poorly soluble     | High              | 1                | 0     | 1      | Weak inhibitor                              | Non-AMES toxic   | III                     | <b>Danger</b>                 | 2.5705                    |
| IND-2    | 446.93                     | 7      | 3     | 1     | 128.34 | 60.33    | 5.13               | Poorly soluble     | High              | 1                | 0     | 1      | Weak inhibitor                              | Non-AMES toxic   | III                     | <b>Danger</b>                 | 2.5368                    |
| IND-3    | 462.92                     | 8      | 4     | 1     | 129.87 | 69.56    | 4.78               | Poorly soluble     | High              | 0                | 0     | 1      | Weak inhibitor                              | Non-AMES toxic   | III                     | <b>Danger</b>                 | 2.6481                    |
| IND-4    | 423.5                      | 10     | 5     | 1     | 120.96 | 72.8     | 3.12               | Moderately Soluble | High              | 0                | 0     | 0      | Weak inhibitor                              | Non-AMES toxic   | III                     | <b>Non-required</b>           | 2.6467                    |
| IND-5    | 453.96                     | 9      | 4     | 1     | 132.43 | 63.57    | 4.18               | Moderately Soluble | High              | 0                | 0     | 0      | Weak inhibitor                              | Non-AMES toxic   | III                     | <b>Non-required</b>           | 2.4728                    |
| IND-6    | 427.92                     | 9      | 4     | 1     | 121.01 | 63.57    | 3.81               | Moderately Soluble | High              | 0                | 0     | 0      | Weak inhibitor                              | Non-AMES toxic   | III                     | <b>Non-required</b>           | 2.4756                    |
| IND-7    | 453.53                     | 11     | 6     | 1     | 127.45 | 82.03    | 3.05               | Moderately Soluble | High              | 0                | 1     | 0      | Weak inhibitor                              | Non-AMES toxic   | III                     | <b>Non-required</b>           | 2.6112                    |

|        |        |    |   |   |        |        |      |                    |      |   |   |   |                |                |     |                     |        |
|--------|--------|----|---|---|--------|--------|------|--------------------|------|---|---|---|----------------|----------------|-----|---------------------|--------|
| IND-8  | 483.56 | 12 | 7 | 1 | 133.94 | 91.26  | 3.15 | Moderately Soluble | High | 0 | 1 | 0 | Weak inhibitor | Non-AMES toxic | III | <b>Non-required</b> | 2.6319 |
| IND-9  | 443.54 | 9  | 4 | 1 | 131.97 | 63.57  | 4.02 | Moderately Soluble | High | 0 | 0 | 0 | Weak inhibitor | Non-AMES toxic | III | <b>Non-required</b> | 2.6762 |
| IND-10 | 509.59 | 12 | 7 | 1 | 145.36 | 91.26  | 3.49 | Moderately Soluble | High | 1 | 1 | 0 | Weak inhibitor | Non-AMES toxic | III | <b>Non-required</b> | 2.5735 |
| IND-11 | 525.59 | 12 | 8 | 1 | 146.44 | 100.49 | 2.95 | Moderately Soluble | High | 1 | 1 | 0 | Weak inhibitor | Non-AMES toxic | III | <b>Non-required</b> | 2.5649 |
| IND-12 | 495.57 | 11 | 7 | 1 | 139.95 | 91.26  | 2.95 | Moderately Soluble | High | 0 | 1 | 0 | Weak inhibitor | Non-AMES toxic | III | <b>Non-required</b> | 2.5009 |
| IND-13 | 514.41 | 9  | 5 | 1 | 134.67 | 72.8   | 3.54 | Moderately Soluble | High | 1 | 0 | 0 | Weak inhibitor | Non-AMES toxic | III | <b>Non-required</b> | 2.6388 |
| IND-14 | 467.99 | 9  | 4 | 1 | 137.24 | 63.57  | 4.47 | Moderately Soluble | High | 0 | 0 | 0 | Weak inhibitor | Non-AMES toxic | III | <b>Non-required</b> | 2.5647 |
| IND-15 | 469.96 | 9  | 5 | 1 | 133.51 | 72.8   | 3.61 | Moderately Soluble | High | 0 | 0 | 0 | Weak inhibitor | Non-AMES toxic | III | <b>Non-required</b> | 2.5521 |
| IND-16 | 462.92 | 8  | 4 | 1 | 129.87 | 69.56  | 4.8  | Poorly soluble     | High | 0 | 0 | 1 | Weak inhibitor | Non-AMES toxic | III | <b>Danger</b>       | 2.566  |
| IND-17 | 467.31 | 7  | 3 | 1 | 128.39 | 60.33  | 5.33 | Poorly soluble     | High | 1 | 0 | 1 | Weak inhibitor | Non-AMES toxic | III | <b>Danger</b>       | 2.5705 |
| IND-18 | 427.92 | 9  | 4 | 1 | 119.48 | 63.57  | 3.59 | Moderately Soluble | High | 0 | 0 | 0 | Weak inhibitor | Non-AMES toxic | III | <b>Non-required</b> | 2.7849 |
| IND-19 | 440.96 | 11 | 3 | 1 | 126.19 | 60.33  | 5.21 | Poorly soluble     | High | 1 | 1 | 1 | Weak inhibitor | Non-AMES toxic | III | <b>Non-required</b> | 2.6996 |
| IND-20 | 504.92 | 9  | 6 | 1 | 139.15 | 118.51 | 4.07 | Poorly soluble     | Low  | 1 | 0 | 1 | Weak inhibitor | AMES toxic     | III | Non-required        | 2.6707 |
| IND-21 | 504.92 | 9  | 6 | 1 | 139.15 | 118.51 | 4.07 | Poorly soluble     | Low  | 1 | 0 | 1 | Weak inhibitor | AMES toxic     | III | Non-required        | 2.7124 |
| IND-22 | 459.92 | 8  | 4 | 1 | 130.33 | 72.69  | 4.73 | Poorly soluble     | High | 0 | 0 | 1 | Weak inhibitor | Non-AMES toxic | III | Non-required        | 2.7362 |
| IND-23 | 494.37 | 8  | 4 | 1 | 135.34 | 72.69  | 5.2  | Poorly soluble     | High | 1 | 0 | 1 | Weak inhibitor | Non-AMES toxic | III | Non-required        | 2.7362 |
| IND-   | 475.   | 8  | 5 | 2 | 132    | 92.9   | 4.3  | Poorly             | High | 0 | 0 | 1 | Weak           | Non-AMES       | III | Non-                | 2.91   |

|        |        |    |   |   |        |        |      |                    |      |   |   |   |                |                |     |              |        |
|--------|--------|----|---|---|--------|--------|------|--------------------|------|---|---|---|----------------|----------------|-----|--------------|--------|
| 24     | 92     |    |   |   | .35    | 2      |      | soluble            |      |   |   |   | inhibitor      | toxic          |     | required     | 62     |
| IND-25 | 489.95 | 9  | 5 | 1 | 136.82 | 81.92  | 4.68 | Poorly soluble     | High | 0 | 0 | 1 | Weak inhibitor | Non-AMES toxic | III | Non-required | 2.7729 |
| IND-26 | 504.92 | 9  | 6 | 1 | 139.15 | 118.51 | 4.02 | Poorly soluble     | Low  | 1 | 0 | 1 | Weak inhibitor | AMES toxic     | III | Non-required | 2.7124 |
| IND-27 | 502.99 | 9  | 4 | 1 | 144.54 | 75.93  | 4.84 | Poorly soluble     | High | 1 | 0 | 1 | Weak inhibitor | Non-AMES toxic | III | Non-required | 2.6017 |
| IND-28 | 550    | 11 | 7 | 1 | 149.81 | 100.38 | 4.66 | Poorly soluble     | High | 1 | 1 | 1 | Weak inhibitor | Non-AMES toxic | III | Non-required | 2.7408 |
| IND-29 | 550    | 11 | 7 | 1 | 149.81 | 100.38 | 4.68 | Poorly soluble     | High | 1 | 1 | 1 | Weak inhibitor | Non-AMES toxic | III | Non-required | 2.7877 |
| IND-30 | 475.92 | 8  | 5 | 2 | 132.35 | 92.92  | 4.3  | Poorly soluble     | High | 0 | 0 | 1 | Weak inhibitor | Non-AMES toxic | III | Non-required | 2.9162 |
| IND-31 | 489.95 | 9  | 5 | 1 | 136.82 | 81.92  | 4.75 | Poorly soluble     | High | 0 | 0 | 1 | Weak inhibitor | Non-AMES toxic | III | Non-required | 2.732  |
| IND-32 | 519.98 | 10 | 6 | 1 | 143.31 | 91.15  | 4.72 | Poorly soluble     | High | 1 | 0 | 1 | Weak inhibitor | Non-AMES toxic | III | Non-required | 2.7366 |
| IND-33 | 519.98 | 10 | 6 | 1 | 143.31 | 91.15  | 4.77 | Poorly soluble     | High | 1 | 0 | 1 | Weak inhibitor | Non-AMES toxic | III | Non-required | 2.7521 |
| IND-34 | 519.98 | 10 | 6 | 1 | 143.31 | 91.15  | 4.72 | Poorly soluble     | High | 1 | 0 | 1 | Weak inhibitor | Non-AMES toxic | III | Non-required | 2.8064 |
| IND-35 | 550    | 11 | 7 | 1 | 149.81 | 100.38 | 4.69 | Poorly soluble     | High | 1 | 1 | 1 | Weak inhibitor | Non-AMES toxic | III | Non-required | 2.7366 |
| IND-36 | 550    | 11 | 7 | 1 | 149.81 | 100.38 | 4.76 | Poorly soluble     | High | 1 | 1 | 1 | Weak inhibitor | Non-AMES toxic | III | Non-required | 2.7408 |
| IND-37 | 534    | 11 | 6 | 1 | 148.12 | 91.15  | 5.07 | Poorly soluble     | High | 1 | 1 | 1 | Weak inhibitor | Non-AMES toxic | III | Non-required | 2.8245 |
| IND-38 | 535.98 | 10 | 7 | 2 | 145.34 | 111.38 | 4.42 | Poorly soluble     | High | 1 | 0 | 1 | Weak inhibitor | Non-AMES toxic | III | Non-required | 2.8571 |
| IND-39 | 519.98 | 10 | 6 | 2 | 143.65 | 102.15 | 4.74 | Poorly soluble     | High | 1 | 0 | 1 | Weak inhibitor | Non-AMES toxic | III | Non-required | 2.7831 |
| IND-40 | 491.92 | 8  | 6 | 3 | 134.38 | 113.15 | 4.01 | Moderately Soluble | High | 0 | 0 | 0 | Weak inhibitor | Non-AMES toxic | III | Non-required | 2.8484 |

|        |        |   |   |   |        |        |      |                    |      |   |   |   |                |                |     |              |        |
|--------|--------|---|---|---|--------|--------|------|--------------------|------|---|---|---|----------------|----------------|-----|--------------|--------|
| IND-41 | 505.95 | 9 | 6 | 2 | 138.85 | 102.15 | 4.44 | Poorly soluble     | High | 1 | 0 | 1 | Weak inhibitor | Non-AMES toxic | III | Non-required | 2.8705 |
| IND-42 | 491.92 | 8 | 6 | 3 | 134.38 | 113.15 | 3.94 | Moderately Soluble | High | 0 | 0 | 0 | Weak inhibitor | Non-AMES toxic | III | Non-required | 2.8319 |
| IND-43 | 505.95 | 9 | 6 | 2 | 138.85 | 102.15 | 4.42 | Poorly soluble     | High | 1 | 0 | 1 | Weak inhibitor | Non-AMES toxic | III | Non-required | 2.7957 |
| IND-44 | 507.92 | 8 | 7 | 4 | 136.4  | 133.38 | 3.53 | Moderately Soluble | Low  | 1 | 0 | 1 | Weak inhibitor | Non-AMES toxic | III | Non-required | 2.8242 |
